# Supplementary material for: Volatile Profile Characterization of Commercial Peach (Prunus persica) Cultivars Grown in Georgia, USA
Source: MDPI journal article supplement (doi:10.3390/horticulturae7120516), 2021-11-23
Supplement: s1 [file s1]

**Table S1.** Mean values for volatile compounds (ng.g<sup>-1</sup>) detected in 42 peach cultivars grown in Georgia, United States of America in 2016.

| Cultivar            | ID <sup>a</sup> | A1 <sup>b</sup> | A2      | A3     | A4      | A5     | A7   | B1       | B2     | B3       | B4   |
|---------------------|-----------------|-----------------|---------|--------|---------|--------|------|----------|--------|----------|------|
| August Lady         | AL              | 2.7c-ec         | tr      | 2.4d-g | 3.1f    | tr     | tr   | 10.5f    | tr     | tr       | tr   |
| Augustprince        | AP              | 4.5b-e          | 43.0d-h | 4.3b-e | 4.2ef   | 1.8b-d | 4.6a | 15.3ef   | 138.5b | tr       | tr   |
| Blazeprince         | BP              | 6.1b-e          | tr      | tr     | 9.5b-f  | tr     | tr   | tr       | 33.5cd | 552.5a   | tr   |
| Caroking            | CK              | 1.5de           | 7.9ij   | tr     | 3.7ef   | 0.9de  | tr   | tr       | 5.2cd  | 49.3d-g  | tr   |
| Carored             | CR              | tr              | tr      | tr     | 24.4a   | 2.5b-d | 4.5a | 30.0d-f  | tr     | tr       | 2.1a |
| Early August Prince | EAP             | 2.6c-e          | 38.1d-i | 6.9a-c | 3.9ef   | 1.8b-d | tr   | 8.6f     | 121.1b | tr       | tr   |
| Early Big Red       | EBR             | 4.0b-e          | 53.5c-e | 4.5b-e | 9.2b-f  | 5.3a   | tr   | 16.7ef   | 195.3a | tr       | tr   |
| Early Elberta       | EEB             | tr              | 49.9d-f | 2.2e-g | 5.4d-f  | 1.0c-e | tr   | 72.6b-f  | 8.7cd  | tr       | tr   |
| Encore              | EN              | tr              | 39.5d-i | 3.1d-g | 7.7c-f  | 1.3b-e | tr   | 36.5d-f  | 3.9cd  | 14.1fg   | tr   |
| Fairtime            | FT              | 3.9b-e          | tr      | 7.6ab  | 12.2b-d | 7.0a   | tr   | 18.4d-f  | tr     | tr       | tr   |
| Fat Lady            | FL              | 3.6b-e          | 68.9b-d | 3.8c-f | 6.1d-f  | 1.0c-e | tr   | 191.0bc  | 14.1cd | tr       | tr   |
| Fiesta Gem          | FG              | 33.4a           | tr      | 7.5ab  | 15.3b   | tr     | tr   | 925.6a   | 121.5b | tr       | tr   |
| Fireprince          | FP              | tr              | 38.6d-i | tr     | 9.5b-f  | 3.1b   | tr   | 13.0ef   | 5.0cd  | tr       | tr   |
| Flameprince27       | FP27            | 1.5de           | 17.5f-j | 0.8fg  | 3.9ef   | tr     | tr   | 4.7f     | 31.9cd | tr       | tr   |
| Flameprince29       | FP29            | 7.3b-d          | 47.3d-g | 2.0e-g | 7.8c-f  | 1.7b-e | tr   | 23.2d-f  | 228.3a | tr       | tr   |
| Flavorich           | FR              | tr              | tr      | tr     | 10.0b-f | tr     | tr   | 103.4b-f | 4.2cd  | tr       | tr   |
| Gala                | GA              | tr              | tr      | tr     | 7.3c-f  | 1.9b-d | tr   | tr       | 3.6cd  | 36.2e-g  | tr   |
| Goldprince          | GP              | tr              | tr      | tr     | 4.4ef   | 1.2c-e | tr   | 47.6c-f  | 4.4cd  | tr       | tr   |
| Harvester           | HA              | tr              | 25.4e-j | 5.9a-d | 9.0b-f  | tr     | tr   | 162.8b-e | 11.8cd | tr       | tr   |
| Julyprince          | JUL             | tr              | 14.4g-j | tr     | 5.1d-f  | 1.4b-e | tr   | 4.3f     | tr     | tr       | tr   |
| Junefire            | JF              | 0.9de           | 12.6h-j | tr     | 6.0d-f  | 1.7b-e | tr   | 52.7c-f  | tr     | tr       | 0.4c |
| Juneprince          | JP              | tr              | tr      | 0.7fg  | 7.4c-f  | 1.8b-d | tr   | 13.2ef   | tr     | tr       | tr   |
| Majestic            | MJ              | tr              | 87.1ab  | tr     | 5.8d-f  | 3.1b   | tr   | tr       | 12.4cd | 58.7d-g  | tr   |
| O'Henry             | OH              | 3.8b-e          | 31.7e-j | tr     | 4.4ef   | 0.9de  | tr   | 27.6d-f  | tr     | 122.0c-f | 0.8b |
| Elberta             | EB              | tr              | 29.6e-j | tr     | 7.5c-f  | tr     | tr   | tr       | tr     | 48.2d-g  | tr   |
| Elberta #2          | EB2             | 0.9de           | 36.1d-i | 1.7e-g | 3.6f    | 0.8de  | tr   | 33.5d-f  | 4.6cd  | tr       | tr   |
| Red Globe           | RG              | tr              | 88.6ab  | 1.7e-g | 4.5ef   | 1.8b-d | tr   | 6.1f     | tr     | tr       | tr   |
| Rich Lady           | RL              | 1.5de           | tr      | tr     | 4.0ef   | tr     | tr   | tr       | 7.9cd  | 133.1c-e | tr   |
| Rich Pride          | RP              | tr              | tr      | tr     | 4.8d-f  | 1.0c-e | tr   | 95.8b-f  | 12.3cd | tr       | tr   |
| Rubyprince          | RUB             | tr              | tr      | tr     | 5.5d-f  | 1.0c-e | tr   | 203.5b   | 13.0cd | 173.3c   | tr   |

|                |      |        |         |        |         |        |    |          |        |         |      |
|----------------|------|--------|---------|--------|---------|--------|----|----------|--------|---------|------|
| Ruston Red     | RR   | 1.8c-e | 104.9a  | 4.0c-f | 3.9ef   | 1.3c-e | tr | 72.7b-f  | 6.1cd  | tr      | tr   |
| Scarletprince  | SP   | 2.6c-e | 11.6h-j | tr     | 5.4d-f  | 1.7b-d | tr | 11.5f    | tr     | 84.7c-g | tr   |
| Sierra Rich    | SR   | 6.7b-e | tr      | tr     | 2.9f    | 2.7bc  | tr | 21.8d-f  | tr     | 326.4b  | tr   |
| Southern Pearl | SOU  | tr     | 85.4a-c | 2.5d-g | 8.5b-f  | tr     | tr | 96.5b-f  | 17.4cd | tr      | tr   |
| Springflame    | SF   | 5.4b-e | tr      | tr     | 14.2bc  | 2.0b-d | tr | tr       | 20.4cd | 160.1cd | tr   |
| Springprince   | SPR  | 8.5bc  | tr      | tr     | 30.9a   | 2.7bc  | tr | 168.5b-d | 36.4cd | tr      | tr   |
| Summerflame    | SUM  | 9.6b   | tr      | 8.9a   | 5.2d-f  | 2.4b-d | tr | 63.8b-f  | 37.4c  | 160.4cd | tr   |
| Summerflame1   | SUM1 | 5.2b-e | tr      | 1.1e-g | 2.9f    | 0.8de  | tr | 34.1d-f  | 13.5cd | tr      | tr   |
| Sureprince     | SUR  | tr     | tr      | tr     | 6.5d-f  | 2.2b-d | tr | 24.4d-f  | 2.7cd  | tr      | tr   |
| White Lady     | WL   | tr     | 37.9d-i | 2.3e-g | 4.7ef   | 1.7b-e | tr | 51.1c-f  | 8.9cd  | tr      | 0.8b |
| Zee Diamond    | ZD   | 1.5de  | tr      | tr     | 11.1b-e | 1.4b-e | tr | 86.7b-f  | 4.2cd  | tr      | tr   |
| Zee Pride      | ZP   | tr     | tr      | tr     | 7.8c-f  | 2.0b-d | tr | 20.7d-f  | 2.0cd  | tr      | tr   |

<sup>a</sup> ID represents abbreviation of cultivar names.

<sup>b</sup> The letter plus the number represents compound corresponding to the code in Table 1.

<sup>c</sup> Different letters within a column indicate significant difference between genotypes using LSD test at  $P < 0.05$ .

<sup>tr</sup> Traces: minimum quantitative value of  $< 0.4 \text{ ng.g}^{-1}$ .

**Table S1.** Continued.

| <b>Cultivar</b>     | <b>ID<sup>a</sup></b> | <b>B5<sup>b</sup></b> | <b>B6</b> | <b>E1</b> | <b>E2</b> | <b>E3</b> | <b>E4</b> | <b>E5</b> | <b>E6</b> | <b>E7</b> | <b>E8</b> |
|---------------------|-----------------------|-----------------------|-----------|-----------|-----------|-----------|-----------|-----------|-----------|-----------|-----------|
| August Lady         | AL                    | tr                    | 2.3bc     | 1.5b-e    | 100.9d-i  | 243.9e-j  | 120.0e-i  | tr        | 1.4g-i    | tr        | tr        |
| Augustprince        | AP                    | 2.0g-m <sup>c</sup>   | 6.3bc     | 1.3c-e    | 100.3d-i  | 297.8e-i  | 155.2e-i  | tr        | 3.3e-i    | tr        | 1.4c-f    |
| Blazeprince         | BP                    | 4.1c-i                | 27.6bc    | tr        | 193.9c    | 1023.7ab  | 408.0cd   | tr        | tr        | tr        | tr        |
| Caroking            | CK                    | 1.5i-m                | tr        | 0.9e      | 33.6ij    | 86.8h-j   | 42.1hi    | tr        | 2.5e-i    | 1.1c      | tr        |
| Carored             | CR                    | 8.3a                  | 111.5a    | tr        | 28.6ij    | 275.2e-j  | 232.8d-h  | tr        | 2.2f-i    | tr        | tr        |
| Early August Prince | EAP                   | 2.6f-m                | 16.3bc    | 2.1bc     | 85.3f-i   | 354.6e-h  | 171.4e-i  | tr        | 5.5d-g    | tr        | 2.3bc     |
| Early Big Red       | EBR                   | 4.2c-h                | 21.4bc    | tr        | 162.8c-f  | 399.9d-g  | 245.2d-h  | tr        | tr        | tr        | 1.8cd     |
| Early Elberta       | EEB                   | 2.5f-m                | 5.1bc     | 1.9b-d    | 72.8g-j   | 271.8e-j  | 215.4d-i  | 2.5b-e    | 2.6e-i    | tr        | 1.6c-e    |
| Encore              | EN                    | 5.4b-e                | 3.8bc     | 3.6a      | 64.0ij    | 244.2e-j  | 115.5e-i  | 1.9c-g    | 22.8a     | 5.3c      | 0.4fg     |
| Fairtime            | FT                    | 6.0a-d                | 14.0bc    | tr        | 410.8a    | 819.8bc   | 685.5b    | tr        | 2.5e-i    | tr        | 3.2b      |
| Fat Lady            | FL                    | 3.5d-l                | 12.5bc    | tr        | 153.7c-h  | 684.7cd   | 432.1cd   | 0.9f-h    | 3.3e-i    | tr        | 2.4bc     |
| Fiesta Gem          | FG                    | 4.1c-i                | tr        | tr        | 101.2d-i  | 1129.8a   | 921.9a    | tr        | tr        | tr        | tr        |
| Fireprince          | FP                    | 4.4c-h                | 1.4bc     | tr        | 77.4g-j   | 116.7g-j  | 69.1hi    | 2.3c-e    | 9.1cd     | tr        | tr        |
| Flameprince 27      | FP27                  | 1.3j-m                | 1.8bc     | tr        | 21.5ij    | 40.5ij    | 37.8hi    | tr        | 1.0hi     | tr        | tr        |
| Flameprince 29      | FP29                  | 2.8e-l                | 6.0bc     | tr        | 154.7c-g  | 419.3d-f  | 183.7e-i  | tr        | 3.5e-i    | tr        | 5.1a      |
| Flavorich           | FR                    | 3.5d-l                | 24.3bc    | tr        | 31.7ij    | 453.1de   | 322.7c-e  | 2.1c-f    | 5.1d-h    | tr        | tr        |
| Gala                | GA                    | 2.5f-m                | 4.3bc     | tr        | 22.4ij    | 100.3h-j  | 46.0hi    | tr        | 1.6g-i    | tr        | 0.6e-g    |
| Goldprince          | GP                    | 1.9g-m                | 8.0bc     | tr        | 21.9ij    | 125.1f-j  | 92.4f-i   | tr        | 2.6e-i    | tr        | tr        |
| Harvester           | HA                    | 3.7d-k                | 3.9bc     | tr        | 96.2d-i   | 771.2bc   | 504.7bc   | tr        | tr        | tr        | tr        |
| Julyprince          | JUL                   | 1.9g-m                | 7.1bc     | tr        | 65.6ij    | 107.7g-j  | 63.5hi    | tr        | 2.8e-i    | tr        | tr        |
| Junefire            | JF                    | 3.2e-l                | 1.6bc     | tr        | 90.7e-i   | 240.0e-j  | 136.8e-i  | tr        | 2.2f-i    | tr        | tr        |
| Juneprince          | JP                    | 4.5c-g                | 0.8bc     | tr        | 28.4ij    | 31.2ij    | 41.0hi    | 2.7b-d    | 6.5c-e    | 1.8c      | 0.4fg     |
| Majestic            | MJ                    | 4.9b-f                | 15.4bc    | tr        | 87.9e-i   | 90.5h-j   | 42.4hi    | 2.5b-e    | 8.9cd     | 5.6c      | tr        |
| O'Henry             | OH                    | 2.7f-m                | 2.1bc     | 1.1de     | 152.1c-h  | 141.6f-j  | 55.8hi    | 0.9f-h    | 1.4g-i    | tr        | 0.9d-g    |
| Elberta             | EB                    | 3.7d-k                | 4.5bc     | 2.3b      | 49.4ij    | 224.3e-j  | 110.9e-i  | 2.8bc     | 10.0c     | tr        | tr        |
| Elberta #2          | EB2                   | tr                    | tr        | 0.8e      | 28.6ij    | 61.4h-j   | 54.6hi    | 1.4d-g    | 1.6g-i    | tr        | tr        |
| Red Globe           | RG                    | 2.6f-m                | 4.8bc     | tr        | 71.8g-j   | 50.6ij    | 38.5hi    | 0.7gh     | tr        | tr        | tr        |
| Rich Lady           | RL                    | 1.8h-m                | tr        | tr        | 69.9h-j   | 160.9e-j  | 79.0f-i   | tr        | 2.5e-i    | tr        | 1.0d-g    |
| Rich Pride          | RP                    | 2.0g-m                | tr        | tr        | 63.1ij    | 138.4f-j  | 67.9hi    | tr        | 2.0f-i    | tr        | tr        |
| Rubyprince          | RUB                   | 1.7h-m                | tr        | tr        | tr        | 415.7d-f  | tr        | tr        | 1.9g-i    | tr        | 1.5c-e    |

|                |      |        |        |        |          |          |          |        |        |       |        |
|----------------|------|--------|--------|--------|----------|----------|----------|--------|--------|-------|--------|
| Ruston Red     | RR   | 2.0g-m | 4.2bc  | 1.8b-d | 52.7ij   | 190.1e-j | 113.7e-i | 1.7c-g | 2.5e-i | tr    | tr     |
| Scarletprince  | SP   | 2.1g-m | 7.4bc  | 1.5c-e | 99.5d-i  | 162.6e-j | 55.4hi   | tr     | 1.8g-i | 1.5c  | 0.6e-g |
| Sierra Rich    | SR   | 2.6f-m | 10.7bc | tr     | 180.2cd  | 172.8e-j | 183.8e-i | tr     | 0.7i   | tr    | 1.6c-e |
| Southern Pearl | SOU  | 6.4a-c | 8.8bc  | tr     | 170.5c-e | 752.7bc  | 725.8ab  | 6.5a   | 14.4b  | tr    | tr     |
| Springflame    | SF   | 3.9c-j | 6.1bc  | tr     | 37.2ij   | 139.3f-j | 101.5e-i | tr     | 1.3hi  | tr    | 1.4c-f |
| Springprince   | SPR  | 7.5ab  | 2.2bc  | tr     | 51.1ij   | 293.4e-j | 302.7c-f | 2.1c-f | 1.3hi  | tr    | tr     |
| Summerflame    | SUM  | 1.0lm  | 10.3bc | tr     | 307.1b   | tr       | 297.6c-g | tr     | 1.7g-i | tr    | 3.1b   |
| Summerflame1   | SUM1 | 1.0k-m | 2.1bc  | 0.7ef  | 91.8e-i  | 171.1e-j | 75.5g-i  | 0.9f-h | 0.9i   | tr    | tr     |
| Sureprince     | SUR  | 3.6d-l | 2.2bc  | tr     | 36.5ij   | 108.6g-j | 63.7hi   | tr     | 6.1c-f | 58.7a | tr     |
| White Lady     | WL   | 3.4d-l | 2.6bc  | 1.1de  | 43.9ij   | 91.1h-j  | 70.0hi   | 3.7b   | 3.8e-i | tr    | 1.8cd  |
| Zee Diamond    | ZD   | 2.9e-l | 37.5b  | tr     | 26.4ij   | 203.5e-j | 216.4d-i | 1.4e-g | 2.3f-i | tr    | tr     |
| Zee Pride      | ZP   | 4.1c-i | 1.0bc  | tr     | 46.2ij   | 86.7h-j  | 120.2e-i | 1.9c-g | 6.1c-f | 26.5b | tr     |

<sup>a</sup> ID represents abbreviation of cultivar names.

<sup>b</sup> The letter plus the number represents compound corresponding to the code in Table 1.

<sup>c</sup> Different letters within a column indicate significant difference between genotypes using LSD test at  $P < 0.05$ .

<sup>tr</sup> Traces: minimum quantitative value of  $< 0.4 \text{ ng.g}^{-1}$ .

Table S1. Continued.

| Cultivar            | ID <sup>a</sup> | E9 <sup>b</sup>     | E10    | L1     | L2    | L3    | L4    | L5      | L6       | L7       | L8      |
|---------------------|-----------------|---------------------|--------|--------|-------|-------|-------|---------|----------|----------|---------|
| August Lady         | AL              | 4.0b-e <sup>c</sup> | 3.4b-d | 2.1i-l | tr    | tr    | tr    | 77.7bc  | 160.5f-m | 78.4b-f  | 13.4f-k |
| Augustprince        | AP              | 4.4b-e              | 2.5b-e | 4.3d-l | tr    | 1.0d  | tr    | 52.3b-i | 123.5h-m | 61.6c-f  | 12.0g-k |
| Blazeprince         | BP              | tr                  | tr     | 10.4bc | tr    | tr    | tr    | 46.2b-j | 184.4f-l | 48.3c-f  | 23.8d-k |
| Caroking            | CK              | 1.8de               | tr     | 5.4c-l | 2.6cd | tr    | tr    | 20.2f-j | 158.6f-m | 38.5c-f  | 16.1f-k |
| Carored             | CR              | 15.3a               | tr     | 10.5bc | tr    | tr    | tr    | 54.1b-i | 153.8f-m | 51.5c-f  | 14.3f-k |
| Early August Prince | EAP             | 6.0b-d              | 2.2b-e | 3.9f-l | tr    | tr    | tr    | 38.6c-j | 90.2i-m  | 41.1c-f  | 6.4i-k  |
| Early Big Red       | EBR             | tr                  | tr     | 6.7b-k | tr    | tr    | tr    | 29.3d-j | 139.3g-m | 62.9c-f  | 7.5h-k  |
| Elberta             | EEB             | 4.2b-e              | 3.0b-e | 6.1b-k | tr    | tr    | 0.8cd | 33.9d-j | 328.1c-e | 72.0b-f  | 44.3b-d |
| Encore              | EN              | 9.1b                | 6.8a   | 8.2b-h | 8.3b  | tr    | 0.6cd | 57.1b-g | 292.7c-f | 102.5b-d | 32.6b-g |
| Fairtime            | FT              | tr                  | 1.9de  | 9.7b-d | tr    | tr    | tr    | 134.1a  | 394.2a-c | 189.3a   | 31.1c-h |
| Fat Lady            | FL              | 8.5bc               | 5.0a-c | 6.8b-k | tr    | tr    | tr    | 66.7b-d | 181.9f-l | 39.6c-f  | 14.0f-k |
| Fiesta Gem          | FG              | tr                  | tr     | tr     | tr    | tr    | tr    | 19.7f-j | 112.7h-m | 52.7c-f  | 54.4bc  |
| Fireprince          | FP              | 5.8b-d              | 2.9b-e | 5.9b-k | 7.8b  | 1.2cd | tr    | 49.9b-i | 327.5c-e | 84.8b-e  | 22.3d-k |
| Flameprince 27      | FP27            | 1.9de               | tr     | 1.5kl  | tr    | tr    | tr    | 15.2h-j | 27.1m    | 12.6f    | tr      |
| Flameprince 29      | FP29            | 5.8b-d              | 5.1ab  | 1.8j-l | tr    | tr    | tr    | 30.1d-j | 64.3j-m  | 36.6c-f  | 2.5jk   |
| Flavorich           | FR              | 4.7b-e              | 3.4b-d | 4.1e-l | tr    | tr    | tr    | 29.0d-j | 161.9f-m | 72.0b-f  | 30.9c-h |
| Gala                | GA              | 1.8de               | 1.6de  | 4.3e-l | 2.3cd | tr    | 0.8cd | 54.6b-h | 131.9h-m | 43.5c-f  | 17.7e-k |
| Goldprince          | GP              | 1.8de               | tr     | tr     | tr    | tr    | tr    | 16.9f-j | 63.8j-m  | 14.2ef   | 10.3g-k |
| Harvester           | HA              | tr                  | tr     | 9.4b-e | tr    | tr    | tr    | 39.2c-j | 160.7f-m | 72.8b-f  | 13.8f-k |
| Julyprince          | JUL             | 4.5b-e              | 2.9b-e | 5.6b-k | 2.6cd | tr    | tr    | 22.6e-j | 142.1g-m | 54.4c-f  | 3.6i-k  |
| Junefire            | JF              | 1.9de               | 2.0c-e | 9.0b-f | 3.5cd | tr    | 0.4cd | 62.6b-e | 197.3e-j | 79.1b-f  | 16.3f-k |
| Juneprince          | JP              | 3.7b-e              | 2.7b-e | 9.1b-f | 4.0c  | 1.7c  | 2.0a  | 84.1b   | 213.8e-i | 48.1c-f  | 27.4d-i |
| Majestic            | MJ              | tr                  | tr     | 7.0b-j | 12.6a | 2.4b  | 2.0a  | 67.1b-d | 502.9a   | 135.2ab  | 55.9b   |
| O'Henry             | OH              | tr                  | 2.1b-e | 3.4g-l | tr    | tr    | 1.2bc | 68.0b-d | 184.8f-l | 84.1b-f  | 15.7f-k |
| Elberta             | EB              | 5.8b-d              | 3.2b-d | 8.7b-g | 8.9b  | tr    | 1.1bc | 57.5b-f | 383.7a-d | 104.6bc  | 56.6b   |
| Elberta #2          | EB2             | 1.4de               | tr     | 2.6i-l | tr    | tr    | tr    | 6.4j    | 51.9lm   | 14.1ef   | 5.5i-k  |
| Red Globe           | RG              | 2.9c-e              | 2.1b-e | 4.4d-l | 4.1c  | tr    | tr    | 23.3e-j | 139.6g-m | 68.0b-f  | 5.7i-k  |
| Rich Lady           | RL              | 2.6de               | 1.2de  | 2.6i-l | 1.5de | tr    | tr    | 40.9c-j | 114.6h-m | 35.0c-f  | 9.7g-k  |
| Rich Pride          | RP              | 2.6de               | 1.2de  | 2.3i-l | 1.6de | tr    | tr    | 51.3b-i | 108.9h-m | 32.2d-f  | 9.4g-k  |
| Rubyprince          | RUB             | 2.8c-e              | 1.9de  | 5.5b-k | tr    | tr    | tr    | 13.9h-j | 69.0j-m  | 30.3ef   | 6.0i-k  |

|                |      |        |        |        |       |       |       |         |          |         |         |
|----------------|------|--------|--------|--------|-------|-------|-------|---------|----------|---------|---------|
| Ruston Red     | RR   | 2.0de  | 1.6de  | 4.4d-l | tr    | tr    | 1.7ab | 29.3d-j | 225.1e-i | 66.6b-f | 43.8b-d |
| Scarletprince  | SP   | tr     | tr     | 2.5i-l | tr    | tr    | tr    | 6.1j    | 56.6j-m  | 20.1ef  | 4.1i-k  |
| Sierra Rich    | SR   | 1.6de  | tr     | 3.1h-l | 4.1c  | tr    | tr    | 76.4bc  | 243.3d-h | 63.5b-f | 21.9d-k |
| Southern Pearl | SOU  | 5.8b-d | 3.1b-d | 18.4a  | 7.2b  | tr    | tr    | 46.0b-j | 442.9ab  | 190.9a  | 84.1a   |
| Springflame    | SF   | 1.7de  | tr     | 3.8f-l | tr    | tr    | tr    | 16.2g-j | 54.1k-m  | 22.4ef  | 2.2jk   |
| Springprince   | SPR  | 2.1de  | tr     | 10.9b  | tr    | tr    | tr    | 83.7b   | 280.4c-g | 81.3b-f | 37.5b-f |
| Summerflame    | SUM  | tr     | tr     | 1.6kl  | tr    | tr    | tr    | 29.7d-j | 89.4i-m  | 48.4c-f | 10.4g-k |
| Summerflame1   | SUM1 | 1.3de  | tr     | 2.5i-l | tr    | tr    | tr    | 33.7d-j | 90.1i-m  | 23.7ef  | 8.2h-k  |
| Sureprince     | SUR  | 1.8de  | 1.2de  | 7.3b-i | 3.2cd | tr    | 0.9c  | 36.6c-j | 193.8e-k | 54.9c-f | 26.1d-j |
| White Lady     | WL   | 2.4de  | 2.5b-e | 6.1b-k | 2.8cd | 1.7cd | tr    | 36.7c-j | 220.3e-i | 77.8b-f | 21.2d-k |
| Zee Diamond    | ZD   | tr     | tr     | 4.7d-l | tr    | tr    | tr    | 13.0ij  | 69.3j-m  | 27.8ef  | 7.7h-k  |
| Zee Pride      | ZP   | tr     | tr     | 8.5b-g | 4.0c  | 3.3a  | 1.1bc | 61.5b-e | 241.2e-h | 78.0b-f | 41.1b-e |

<sup>a</sup> ID represents abbreviation of cultivar names.

<sup>b</sup> The letter plus the number represents compound corresponding to the code in Table 1.

<sup>c</sup> Different letters within a column indicate significant difference between genotypes using LSD test at  $P < 0.05$ .

<sup>tr</sup> Traces: minimum quantitative value of  $< 0.4 \text{ ng.g}^{-1}$ .

**Table S1.** Continued.

| <b>Cultivar</b>     | <b>ID<sup>a</sup></b> | <b>T1<sup>b</sup></b> | <b>T2</b> | <b>T3</b> | <b>T4</b> | <b>BA</b> | <b>K1</b> |
|---------------------|-----------------------|-----------------------|-----------|-----------|-----------|-----------|-----------|
| August Lady         | AL                    | tr                    | tr        | tr        | tr        | 2.2g-j    | tr        |
| Augustprince        | AP                    | tr                    | tr        | tr        | 6.3a      | 3.7e-h    | 2bc       |
| Blazeprince         | BP                    | tr                    | tr        | 18.4c-e   | tr        | tr        | 2.4bc     |
| Caroking            | CK                    | tr                    | tr        | tr        | tr        | tr        | tr        |
| Carored             | CR                    | 3.1a-c <sup>c</sup>   | 3.4a-c    | 34.7ab    | tr        | 3.4e-h    | 2.2bc     |
| Early August Prince | EAP                   | tr                    | tr        | tr        | tr        | 4.7d-f    | tr        |
| Early Big Red       | EBR                   | tr                    | tr        | 13.7d-f   | tr        | 7.7c      | tr        |
| Elberta             | EEB                   | tr                    | tr        | tr        | tr        | 3.4e-h    | 1.7bc     |
| Encore              | EN                    | tr                    | tr        | tr        | tr        | tr        | 1.3bc     |
| Fairtime            | FT                    | tr                    | tr        | 20.6c-e   | tr        | 12.9a     | tr        |
| Fat Lady            | FL                    | tr                    | tr        | 5.4fg     | tr        | 6.4cd     | tr        |
| Fiesta Gem          | FG                    | tr                    | tr        | 18.0c-e   | 5.3ab     | tr        | 8.4b      |
| Fireprince          | FP                    | 4.6a                  | 4.8a      | 26.9bc    | tr        | tr        | 2.9bc     |
| Flameprince 27      | FP27                  | tr                    | tr        | tr        | tr        | 1.9h-j    | tr        |
| Flameprince 29      | FP29                  | tr                    | tr        | tr        | 3.8bc     | 3.6e-h    | 2.5bc     |
| Flavorich           | FR                    | tr                    | tr        | tr        | tr        | 1.9h-k    | 3.8bc     |
| Gala                | GA                    | 2.7b-d                | 2.7b-d    | 26.1bc    | 1.8d      | 0.8jk     | tr        |
| Goldprince          | GP                    | tr                    | tr        | tr        | tr        | 0.9jk     | tr        |
| Harvester           | HA                    | tr                    | 3.4a-c    | 25.7b-d   | tr        | tr        | tr        |
| Julyprince          | JUL                   | 3.7ab                 | 4.2ab     | 21.4cd    | tr        | tr        | tr        |
| Junefire            | JF                    | tr                    | tr        | tr        | tr        | tr        | tr        |
| Juneprince          | JP                    | tr                    | tr        | tr        | tr        | 1.4i-k    | tr        |
| Majestic            | MJ                    | tr                    | tr        | tr        | tr        | tr        | tr        |
| O'Henry             | OH                    | tr                    | tr        | tr        | tr        | 1.3i-k    | tr        |
| Elberta             | EB                    | tr                    | tr        | tr        | tr        | tr        | 2.4bc     |
| Elberta #2          | EB2                   | tr                    | tr        | tr        | tr        | 2.3g-j    | tr        |
| Red Globe           | RG                    | 4.3a                  | 4.8a      | 26.1bc    | 1.9d      | tr        | tr        |
| Rich Lady           | RL                    | tr                    | tr        | tr        | tr        | tr        | 1.8bc     |
| Rich Pride          | RP                    | tr                    | 2.3c-e    | 8.9e-g    | tr        | tr        | 1.7bc     |
| Rubyprince          | RUB                   | tr                    | tr        | tr        | 3.2cd     | tr        | 2.2bc     |

|                |      |       |        |         |      |        |       |
|----------------|------|-------|--------|---------|------|--------|-------|
| Ruston Red     | RR   | tr    | tr     | tr      | tr   | 5.3de  | tr    |
| Scarletprince  | SP   | tr    | tr     | tr      | tr   | tr     | tr    |
| Sierra Rich    | SR   | tr    | tr     | tr      | tr   | tr     | 4.1bc |
| Southern Pearl | SOU  | tr    | tr     | tr      | tr   | tr     | 67.9a |
| Springflame    | SF   | 1.8cd | 2.2c-e | 21.5cd  | tr   | 2.9f-i | 1.5bc |
| Springprince   | SPR  | 3.9ab | tr     | 40.8a   | tr   | tr     | 3.8bc |
| Summerflame    | SUM  | tr    | tr     | tr      | tr   | 9.9b   | tr    |
| Summerflame1   | SUM1 | tr    | tr     | tr      | tr   | 3.9e-g | 0.8bc |
| Sureprince     | SUR  | tr    | tr     | tr      | tr   | 1.4i-k | tr    |
| White Lady     | WL   | tr    | tr     | tr      | tr   | tr     | 2.9bc |
| Zee Diamond    | ZD   | 1.4de | 1.3ef  | 17.0c-f | 6.3a | 1.3i-k | 2.2bc |
| Zee Pride      | ZP   | tr    | 1.7de  | tr      | tr   | tr     | tr    |

<sup>a</sup> ID represents abbreviation of cultivar names.

<sup>b</sup> The letter plus the number represents compound corresponding to the code in Table 1.

<sup>c</sup> Different letters within a column indicate significant difference between genotypes using LSD test at  $P < 0.05$ .

<sup>tr</sup> Traces: minimum quantitative value of  $< 0.4 \text{ ng} \cdot \text{g}^{-1}$ .
